# Supplementary material
Source: PubMed Central journal article supplement (PMC7664344)
Supplement: mmc1.pdf [file mmc1.pdf]

**Supplemental Information**

**SARS-CoV-2 Cell Entry Factors ACE2 and TMPRSS2**

**Are Expressed in the Microvasculature and Ducts**

**of Human Pancreas but Are Not Enriched in  $\beta$  Cells**

**Katie C. Coate, Jeeyeon Cha, Shristi Shrestha, Wenliang Wang, Luciana Mateus Gonçalves, Joana Almaça, Meghan E. Kapp, Maria Fasolino, Ashleigh Morgan, Chunhua Dai, Diane C. Saunders, Rita Bottino, Radhika Aramandla, Regina Jenkins, Roland Stein, Klaus H. Kaestner, Golnaz Vahedi, HPAP Consortium, Marcela Brissova, and Alvin C. Powers**

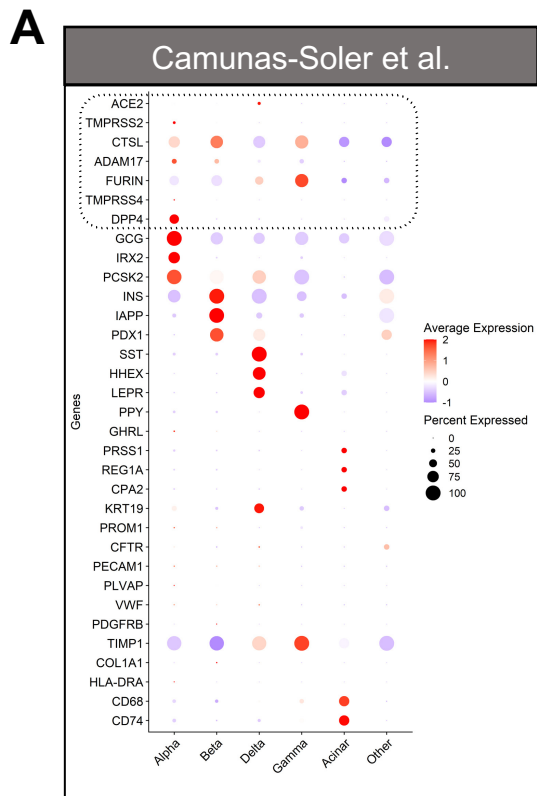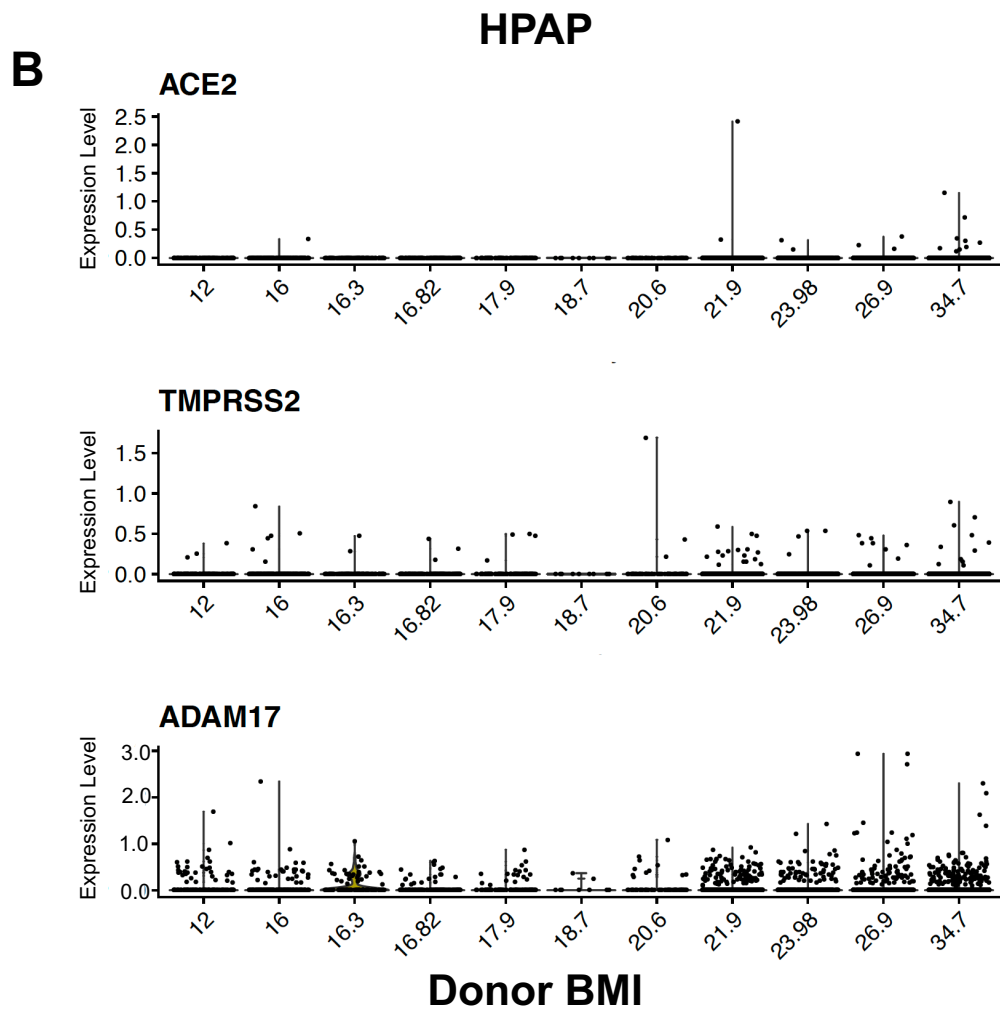

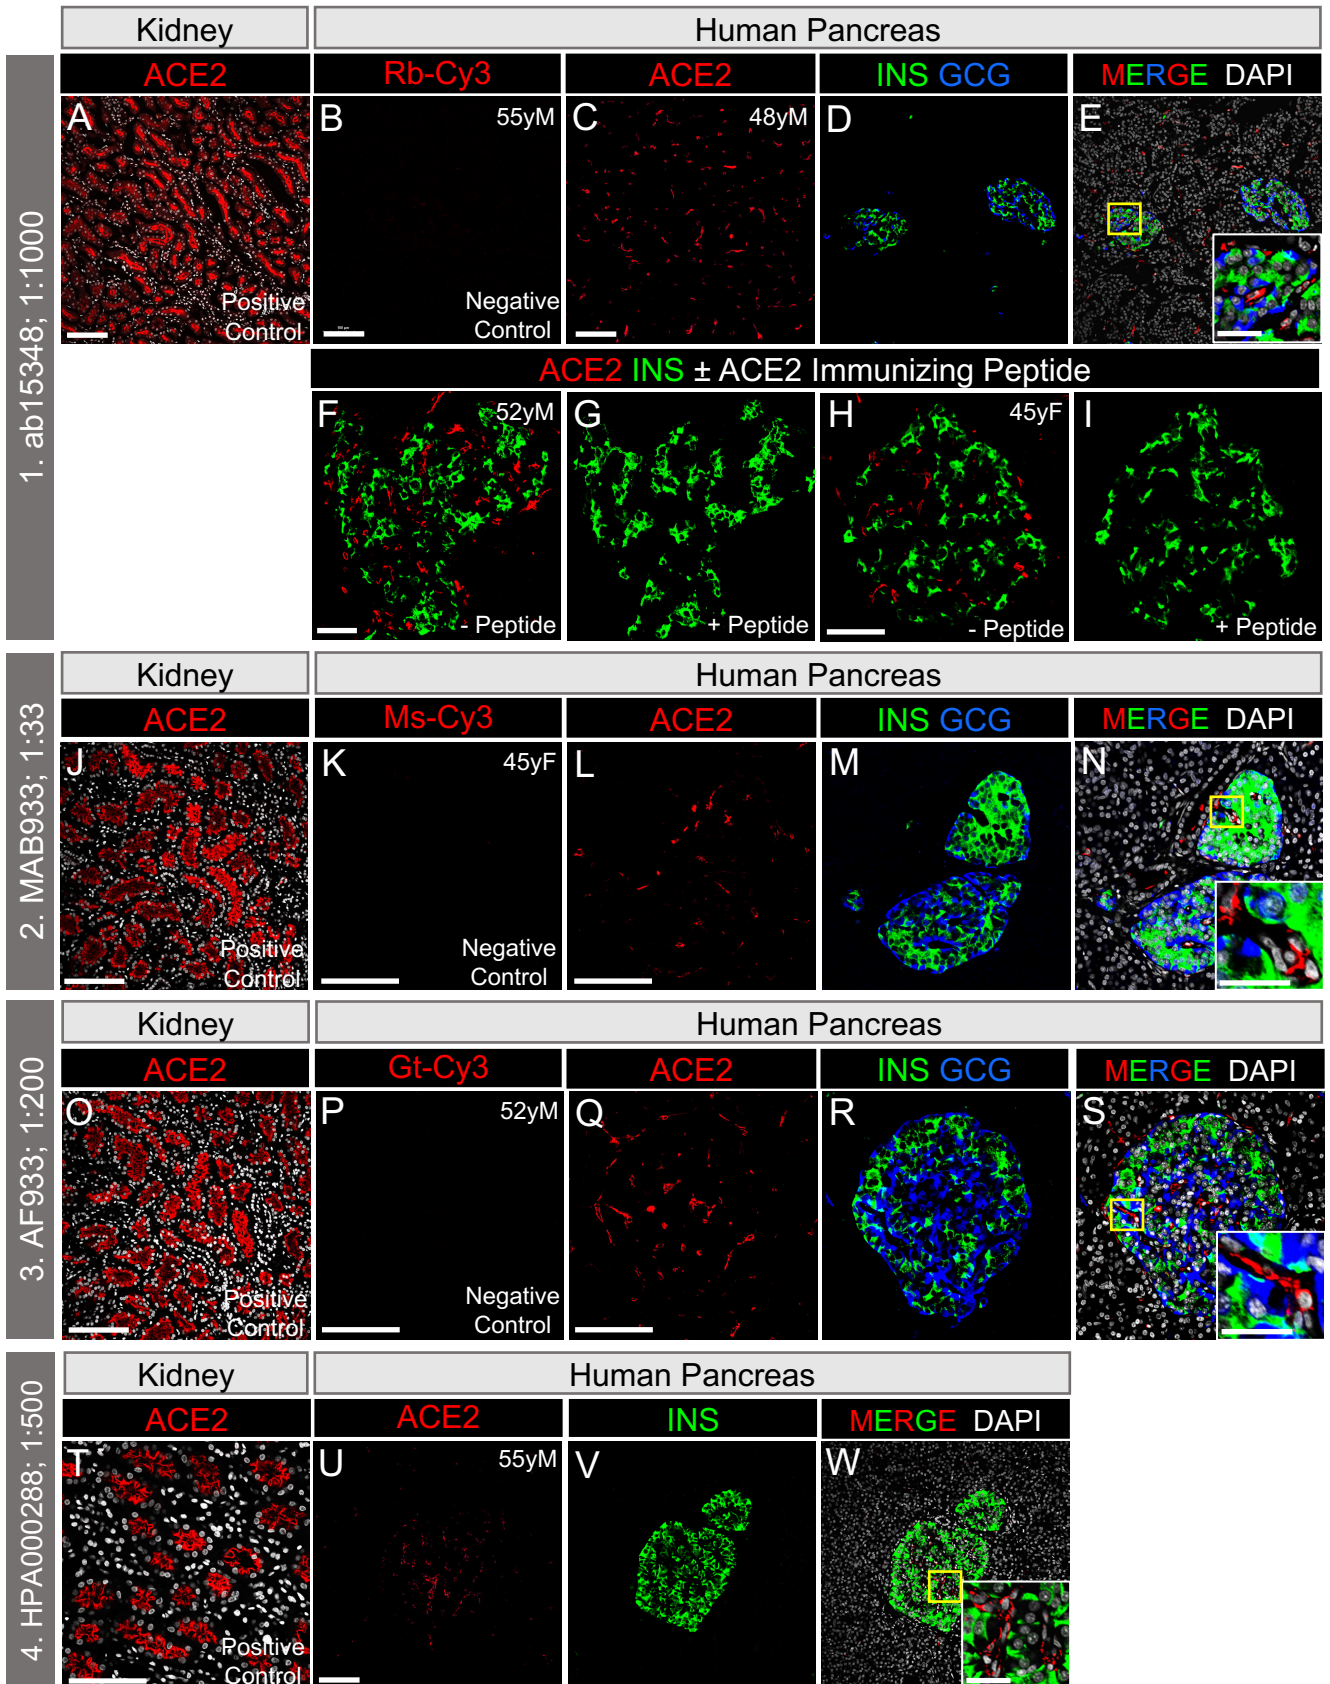



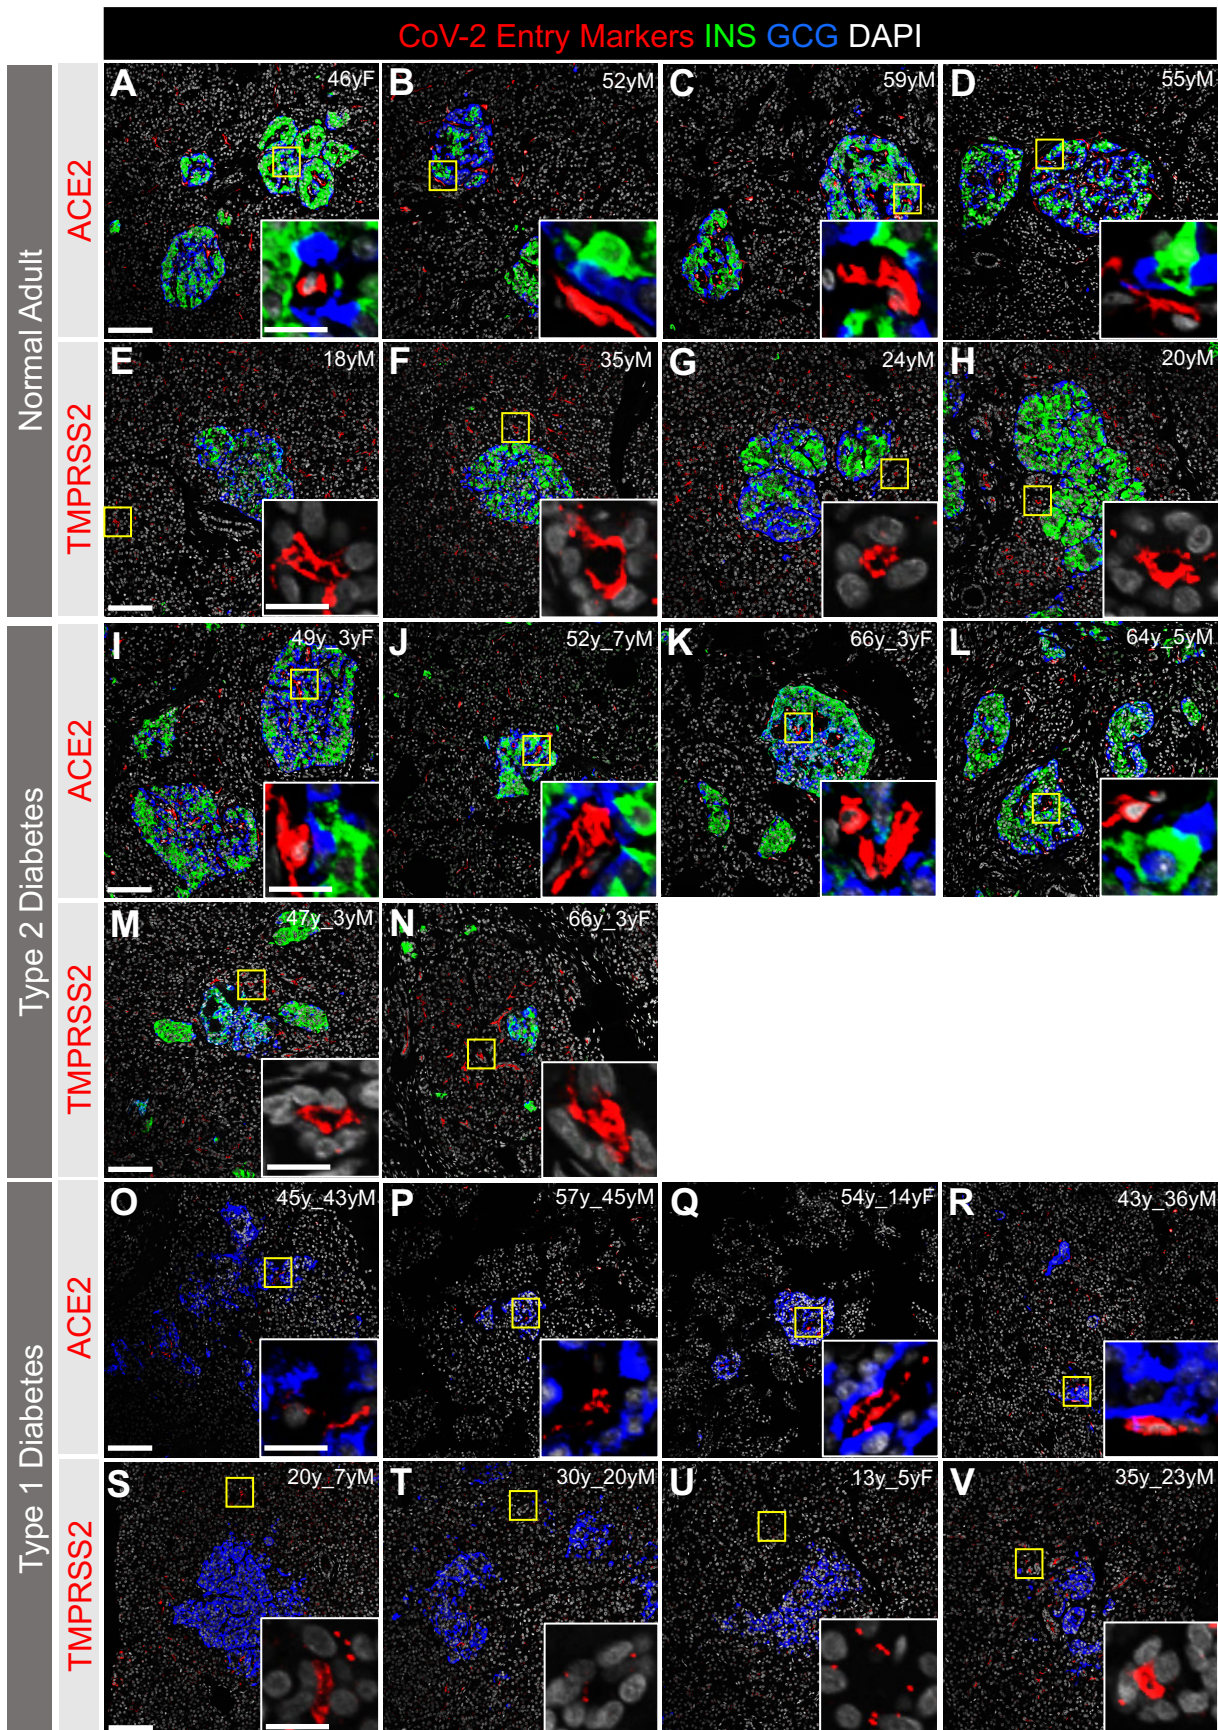



Figure S4

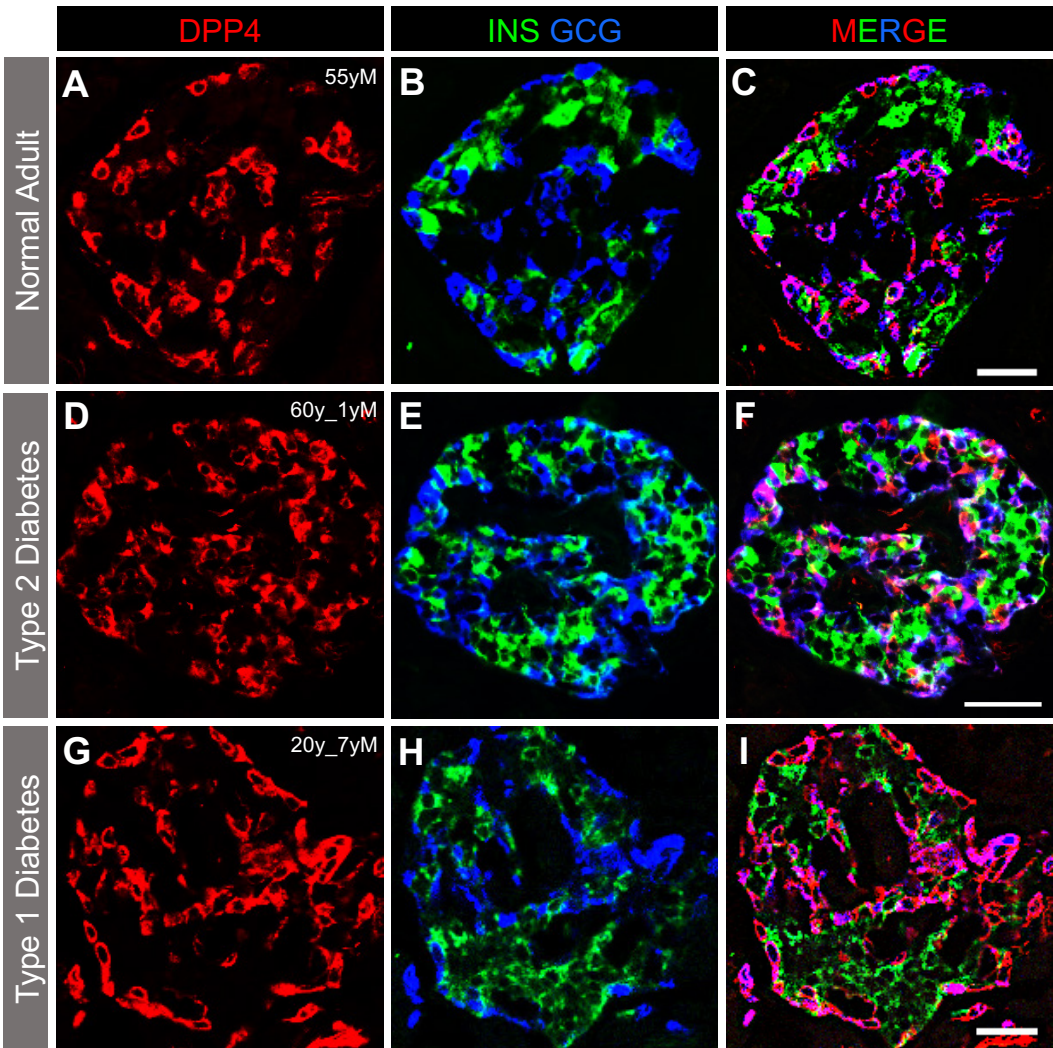

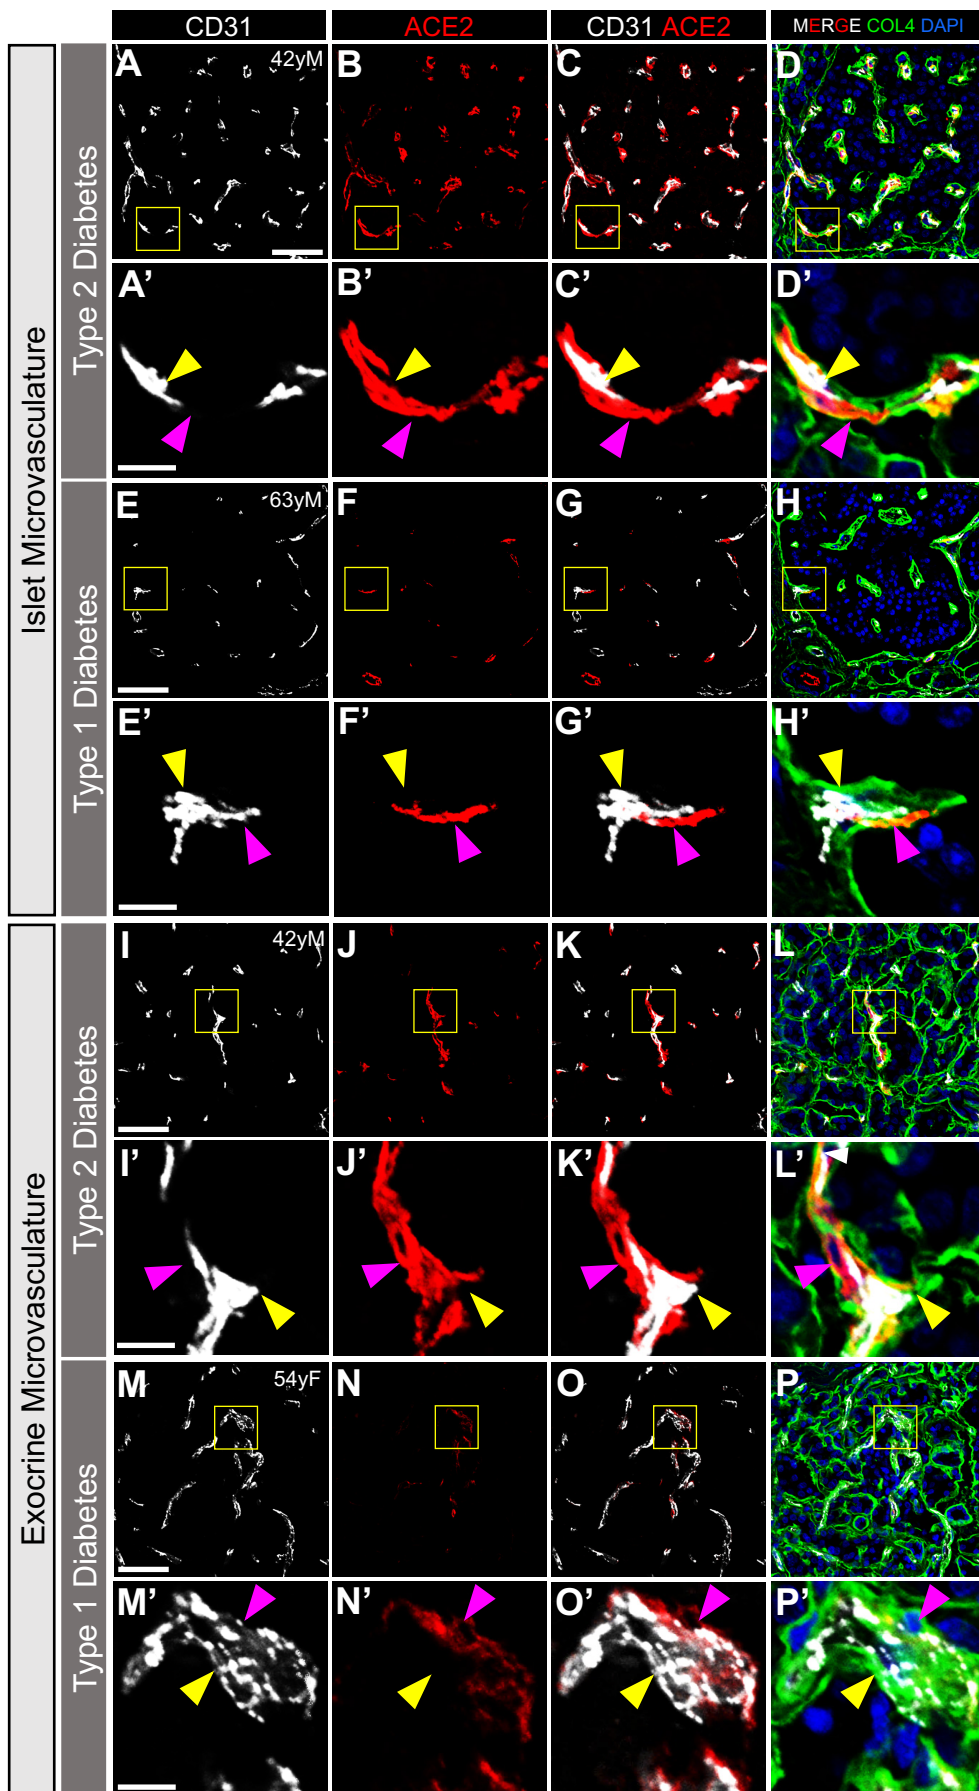

## **Figure S1. Related to Figure 1. Stratification of *ACE2*, *TMPRSS2*, and *ADAM17***

### **Expression in $\beta$ cells by BMI.**

(A) Dot plots of *ACE2*, *TMPRSS2*, *CTSL*, *ADAM17*, *FURIN*, *TMPRSS4*, and *DPP4* mRNA expression compared with cell type-enriched genes from a previously published single cell (sc) RNA-seq datasets (Camunas-Soler et al., 2020). Dot size indicates percentage of cells in a given population expressing the gene; dot color represents scaled average expression. Dotted line highlights *ACE2*, *TMPRSS2*, *CTSL*, *ADAM17*, *FURIN*, *TMPRSS4*, and *DPP4* expression.

(B) *ACE2*, *TMPRSS2*, and *ADAM17* mRNA expression in single  $\beta$  cells according to BMI.  $\beta$  cell gene expression from eleven donors (ages 1-39 years) from the HPAP scRNA-seq dataset (Kaestner et al., 2019) are displayed from lowest to highest BMI. Only one donor had a BMI in the obese range in this dataset. Human pancreatic donor information is available in Table S2.

## **Figure S2. Related to Figure 1 and 2. Testing and Characterization of Four *ACE2*-directed Antibodies on Human Pancreatic Tissue.**

(A-E) Characterization of *ACE2* antibody (red; ab15348) used by Yang et al. (Yang et al., 2020) and Fignani et al. (Fignani, 2020). Antibody epitope encompasses the *ACE2* C-terminal domain (human aa 788-805). Mouse kidney tissue served as a positive control for *ACE2* (A), while normal adult human pancreatic tissue incubated with anti-rabbit-Cy3 secondary antibody only served as a negative control (B). Normal adult human pancreas labeled for *ACE2* (red), *INS* (green,  $\beta$  cells) and *GCG* (blue,  $\alpha$  cells) (C-E). Inset area is marked by a yellow box in MERGE column ( $n = 14$  total images analyzed).

(F-I) *ACE2* neutralization with immunizing peptide. Scale bars are 100  $\mu\text{m}$  (A-E) and 50  $\mu\text{m}$  (Inset, E and F-I) ( $n = 8$  total images analyzed).

(J-N) Characterization of *ACE2* antibody (red; R&D MAB933) at same dilution (1:33) reported by Fignani et al. (Fignani, 2020). Antibody epitope encompasses the *ACE2* extracellular domain (human aa 18-740). Human kidney tissue served as a positive control for *ACE2* (J), while normal adult human pancreatic tissue incubated with anti-mouse-Cy3 secondary antibody only



served as a negative control (K). Normal adult human pancreas labeled for ACE2 (red), INS (green,  $\beta$  cells) and GCG (blue,  $\alpha$  cells) (L-N). Inset area is marked by a yellow box in MERGE column. Scale bars are 50  $\mu\text{m}$  (J-N) and 25  $\mu\text{m}$  (Inset, N) ( $n = 18$  total images analyzed).

(O-S) Characterization of ACE2 antibody (red; R&D AF933) at same dilution (1:200) reported by Yang et al. (Yang et al., 2020). Antibody epitope encompasses the ACE2 extracellular domain (human aa 18-740). Human kidney served as a positive control for ACE2 (O), while normal adult human pancreatic tissue incubated with anti-goat-Cy3 secondary antibody only served as a negative control (P). Normal adult human pancreas labeled for ACE2 (red), INS (green,  $\beta$  cells) and GCG (blue,  $\alpha$  cells) (Q-S). Inset area is marked by a yellow box in MERGE column. Scale bars are 50  $\mu\text{m}$  (O-R) and 25  $\mu\text{m}$  (Inset, S) ( $n = 13$  total images analyzed).

(T-W) Characterization of ACE2 antibody (red; HPA000288) used by the Human Protein Atlas (Uhlen et al., 2015) and Hikmet et al. (Hikmet et al., 2020). Antibody epitope encompasses the ACE2 extracellular domain (human aa 1-111). Human kidney tissue served as a positive control for ACE2 (T). Normal adult human pancreas labeled for ACE2 (red) and INS (green,  $\beta$  cells) (U-W). Inset area is marked by a white dashed box in MERGE column. Scale bars are 100  $\mu\text{m}$  (T-V) and 50  $\mu\text{m}$  (Inset, W). DAPI (white) ( $n = 6$  total images analyzed).

Human pancreatic donor information is available in Table S2 (B, donor N8; C-E, donor N4; F-I, donors N6 and N2; J-N, donor N2; O-S, donor N7; T-W, donor N8).

**Figure S3. Related to Figures 2 and 5. ACE2 and TMPRSS2 Protein in Human Islets and Exocrine Tissue from Adult Donors With and Without Diabetes.**

(A-H) Immunostaining of SARS-CoV-2 cell entry markers ACE2 (antibody ab15348) and TMPRSS2, both shown in red, in islet  $\alpha$  cells (GCG, blue) or  $\beta$  cells (INS, green) in pancreatic sections from adult donors without diabetes. Insets are depicted by a yellow box. DAPI (white) ( $n = 14$  total images analyzed).

(I-N) Immunostaining of SARS-CoV-2 cell entry markers ACE2 (antibody ab15348) and TMPRSS2, both shown in red, in islet  $\alpha$  cells (GCG, blue) or  $\beta$  cells (INS, green) in pancreatic sections from adult donors with type 2 diabetes. Insets are depicted by a yellow box. DAPI (white) ( $n = 12$  total images analyzed).

(O-V) Immunostaining of SARS-CoV-2 cell entry markers ACE2 (antibody ab15348) and TMPRSS2, both shown in red, in islet  $\alpha$  cells (GCG, blue) or  $\beta$  cells (INS, green) in pancreatic sections from adult donors with type 1 diabetes. Insets are depicted by a yellow box. DAPI (white) ( $n = 11$  total images analyzed).

Human islet and pancreatic donor information is available in Table S2 (A-D, donors N3, N7, N9, N8; E-H, donors N14, N12, N11, N10; I-L, donors 2L, 2B, 2G, 2I; M-N, donors 2H, 2G; O-R, donors 1B, 1D, 1C, 1A; S-V, donors 1H, 1K, 1J, 1G). Scale bars are 100  $\mu\text{m}$  (A-V) and 25  $\mu\text{m}$  (Insets).

**Figure S4. Related to Figures 1 and 2. DPP4 Protein in Human Islets from Adult Donors With and Without Diabetes.**

(A-C) Immunostaining of DPP4 (red) in human pancreatic islet  $\alpha$  cells (GCG, blue; merged, magenta) and  $\beta$  cells (INS, green) in pancreatic sections from adult donors without diabetes ( $n = 2$  total images analyzed).

(D-F) Immunostaining of DPP4 (red) in human pancreatic islet  $\alpha$  cells (GCG, blue; merged, magenta) and  $\beta$  cells (INS, green) in pancreatic sections from adult donors with type 2 diabetes ( $n = 2$  total images analyzed).

(G-I) Immunostaining of DPP4 (red) in human pancreatic islet  $\alpha$  cells (GCG, blue; merged, magenta) and  $\beta$  cells (INS, green) in pancreatic sections from adult donors with type 1 diabetes ( $n = 2$  total images analyzed).

Human islet and pancreatic donor information is available in Table S2 (A-C, donor N8; D-F,

donor 2K; G-I, donor 1H). Scale bars are 50  $\mu\text{m}$  (A-I).

**Figure S5. Related to Figures 3 and 4. ACE2 Protein Localization with Islet and Exocrine Capillaries in Adult Human Pancreas of Individuals with Diabetes.**

(A-H') Representative images of endothelial cells (CD31, white) and ACE2-positive perivascular cells (red; antibody ab15348) in the islet microvasculature of individuals with type 2 (A-D') or type 1 diabetes (E-H'). DAPI (blue). ACE2-positive perivascular cells (red; antibody ab15348) and the extracellular matrix marker collagen-IV (COL4, green) within the vascular basement membrane are shown (D, D', H and H'); DAPI counterstain (blue) ( $n = 23$  total images analyzed).

(I-P') Representative images of endothelial cells (CD31, white) and ACE2-positive perivascular cells (red; antibody ab15348) in the exocrine tissue microvasculature of individuals with type 2 (I-L') or type 1 diabetes (M-P'). DAPI (blue). ACE2-positive perivascular cells (red; antibody ab15348) and the extracellular matrix marker collagen-IV (COL4, green) within the vascular basement membrane are shown (L, L', P and P'); DAPI counterstain (blue) ( $n = 23$  total images analyzed).

Human pancreatic donor information is available in Table S2 (A-D', donor 2E; E-H', donor 1F; I- L', donor 2E; M-P', donor 1C). Yellow arrowheads point to CD31-positive endothelial cells, while magenta arrowheads point to perivascular ACE2-positive cells. Insets (A'-P') are depicted by yellow boxes in A-P. Scale bars are 50  $\mu\text{m}$  (A-P) and 10  $\mu\text{m}$  (Insets, A'-P').



**Table S1. Related to Figure 1. Number and Percentage of  $\beta$  cells that Express and Co-express Putative SARS-CoV-2 Cell Entry Genes Across Four Independent scRNA-seq Datasets.**

| Genes                | Droplet-based scRNA-seq                                 |                 |                                                                 |                 | SMART-seq                                                            |                 |                                                                        |                 |
|----------------------|---------------------------------------------------------|-----------------|-----------------------------------------------------------------|-----------------|----------------------------------------------------------------------|-----------------|------------------------------------------------------------------------|-----------------|
|                      | HPAP <sup>a</sup><br>( $\beta$ cell total, $n = 2828$ ) |                 | Baron et al. <sup>b</sup><br>( $\beta$ cell total, $n = 2525$ ) |                 | Segerstolpe et al. <sup>c</sup><br>( $\beta$ cell total, $n = 157$ ) |                 | Camunas-Soler et al. <sup>c</sup><br>( $\beta$ cell total, $n = 194$ ) |                 |
|                      | # $\beta$ cell                                          | % $\beta$ cells | # $\beta$ cell                                                  | % $\beta$ cells | # $\beta$ cell                                                       | % $\beta$ cells | # $\beta$ cell                                                         | % $\beta$ cells |
| <i>ACE2</i>          | 17                                                      | 0.6             | 4                                                               | 0.2             | 3                                                                    | 1.9             | 7                                                                      | 3.6             |
| <i>TMPRSS2</i>       | 60                                                      | 2.1             | 7                                                               | 0.3             | 4                                                                    | 2.5             | 2                                                                      | 1.0             |
| <i>TMPRSS4</i>       | 0                                                       | 0.0             | 0                                                               | 0.0             | 0                                                                    | 0.0             | 3                                                                      | 1.5             |
| <i>CTSL</i>          | 1421                                                    | 50.2            | 977                                                             | 38.7            | 132                                                                  | 84.1            | 161                                                                    | 83.0            |
| <i>FURIN</i>         | 779                                                     | 27.5            | 942                                                             | 37.3            | 91                                                                   | 58.0            | 138                                                                    | 71.1            |
| <i>ADAM17</i>        | 494                                                     | 17.5            | 251                                                             | 9.9             | 78                                                                   | 49.7            | 52                                                                     | 26.8            |
| <i>ACE2, TMPRSS2</i> | 0                                                       | 0.0             | 0                                                               | 0.0             | 0                                                                    | 0.0             | 0                                                                      | 0.0             |
| <i>ACE2, TMPRSS4</i> | 0                                                       | 0.0             | 0                                                               | 0.0             | 0                                                                    | 0.0             | 0                                                                      | 0.0             |
| <i>ACE2, CTSL</i>    | 0                                                       | 0.0             | 2                                                               | 0.1             | 3                                                                    | 1.9             | 6                                                                      | 3.1             |
| <i>ACE2, FURIN</i>   | 0                                                       | 0.0             | 1                                                               | 0.0             | 1                                                                    | 0.6             | 3                                                                      | 1.5             |
| <i>ACE2, ADAM17</i>  | 0                                                       | 0.0             | 0                                                               | 0.0             | 1                                                                    | 0.6             | 2                                                                      | 1.0             |

<sup>a</sup>10x genomics; <sup>b</sup>InDrop (Klein et al., 2015); <sup>c</sup>SMART-seq2 (Picelli et al., 2014)

**Table S2. Related to STAR Methods. Demographic Information of Donors.**

| Donor ID                        | Age                          | Ethnicity / Race | Diabetes Duration | Sex       | BMI      | Cause of Death | Tissue/Islet Source |        |      |
|---------------------------------|------------------------------|------------------|-------------------|-----------|----------|----------------|---------------------|--------|------|
| <b>Juvenile (Histology)</b>     | J1                           | 5 days           | Caucasian         | --        | F        | 14.9           | Anoxia              | IIAM   |      |
|                                 | J2                           | 3 months         | Caucasian         | --        | M        | 16.8           | Anoxia              | NDRI   |      |
|                                 | J3                           | 10 months        | Caucasian         | --        | F        | 15.4           | CVA                 | NDRI   |      |
|                                 | J4                           | 20 months        | Caucasian         | --        | F        | 23.5           | Anoxia              | IIAM   |      |
|                                 | J5                           | 5 years          | Caucasian         | --        | M        | 16.2           | Anoxia              | IIAM   |      |
| <b>Normal Adult (Histology)</b> | N1                           | 42 years         | Caucasian         | --        | M        | 32.2           | Overdose            | TNDS   |      |
|                                 | N2                           | 45 years         | Caucasian         | --        | F        | 29.7           | Anoxia              | OPO    |      |
|                                 | N3                           | 46 years         | Caucasian         | --        | F        | 32.9           | CVA                 | IIAM   |      |
|                                 | N4                           | 48 years         | Caucasian         | --        | M        | 24.6           | Anoxia              | OPO    |      |
|                                 | N5                           | 51 years         | Caucasian         | --        | M        | 20.4           | Anoxia              | OPO    |      |
|                                 | N6                           | 52 years         | Black             | --        | M        | 29.2           | ICH                 | TNDS   |      |
|                                 | N7                           | 52 years         | Caucasian         | --        | M        | 28.1           | Head Trauma         | OPO    |      |
|                                 | N8                           | 55 years         | Black             | --        | M        | 35.6           | CVA                 | IIAM   |      |
|                                 | N9                           | 59 years         | Caucasian         | --        | M        | 32.7           | Head Trauma         | IIAM   |      |
|                                 | N10                          | 20 years         | Hispanic          | --        | M        | 19.4           | Head Trauma         | IIAM   |      |
|                                 | N11                          | 24 years         | Caucasian         | --        | M        | 35.5           | ICH                 | IIAM   |      |
|                                 | N12                          | 35 years         | Caucasian         | --        | M        | 26.8           | Head Trauma         | IIAM   |      |
|                                 | N13                          | 20 years         | Caucasian         | --        | M        | 27.8           | Head Trauma         | NDRI   |      |
|                                 | N14                          | 18 years         | Caucasian         | --        | M        | 25.1           | Head Trauma         | IIAM   |      |
|                                 | HP1754                       | 15 years         | N/A               | --        | M        | 22.6           | Head Trauma         | IIAM   |      |
|                                 | HP2041                       | 29 years         | N/A               | --        | M        | 22.3           | Head Trauma         | IIAM   |      |
|                                 | HP2091                       | 44 years         | N/A               | --        | F        | 23.7           | CVA                 | IIAM   |      |
|                                 | <b>Adult T1D (Histology)</b> | 1A               | 43 years          | N/A       | 36 years | M              | 31.2                | CVA    | NDRI |
|                                 |                              | 1B               | 45 years          | Caucasian | 43 years | M              | 25.0                | Anoxia | IIAM |
| 1C                              |                              | 54 years         | Caucasian         | 14 years  | F        | 24.9           | Anoxia              | IIAM   |      |
| 1D                              |                              | 57 years         | Black             | 45 years  | M        | 33.3           | CVA                 | IIAM   |      |
| 1E                              |                              | 58 years         | Caucasian         | 31 years  | M        | 21.8           | Anoxia              | NDRI   |      |
| 1F                              |                              | 63 years         | Caucasian         | 44 years  | M        | 24.1           | Anoxia              | IIAM   |      |
| 1G                              |                              | 35 years         | Caucasian         | 23 years  | M        | 26.9           | Anoxia              | NDRI   |      |
| 1H                              |                              | 20 years         | Caucasian         | 7 years   | M        | 25.5           | Anoxia              | NDRI   |      |
| 1I                              |                              | 27 years         | Caucasian         | 17 years  | M        | 18.4           | Anoxia              | NDRI   |      |
| 1J                              |                              | 13 years         | Caucasian         | 5 years   | M        | 19.1           | Anoxia              | IIAM   |      |
| 1K                              |                              | 30 years         | Caucasian         | 20 years  | M        | 29.8           | Anoxia              | NDRI   |      |
| <b>Adult T2D (Histology)</b>    | 2A                           | 44 years         | Caucasian         | 7 years   | M        | 44.4           | CVA                 | IIAM   |      |
|                                 | 2B                           | 52 years         | Caucasian         | 7 years   | M        | 33.6           | CVA                 | IIAM   |      |
|                                 | 2C                           | 52 years         | Asian             | 10 years  | F        | 21.9           | CVA                 | NDRI   |      |
|                                 | 2D                           | 52 years         | Caucasian         | < 1 year  | F        | 29.2           | CVA                 | IIAM   |      |
|                                 | 2E                           | 42 years         | Black             | < 1 year  | M        | 42.0           | CVA                 | IIAM   |      |

|                                                     |         |           |           |                           |      |      |             |              |
|-----------------------------------------------------|---------|-----------|-----------|---------------------------|------|------|-------------|--------------|
|                                                     | 2F      | 43 years  | Black     | 1 year                    | M    | 36.0 | Head Trauma | IIAM         |
|                                                     | 2G      | 66 years  | Caucasian | 3 years                   | F    | 32.8 | CVA         | IIAM         |
|                                                     | 2H      | 47 years  | Caucasian | 3 years                   | M    | 31.3 | CVA         | IIAM         |
|                                                     | 2I      | 64 years  | Caucasian | 5 years                   | M    | 33.2 | ICH         | IIAM         |
|                                                     | 2J      | 59 years  | Caucasian | 6 years                   | F    | 27.5 | CVA         | IIAM         |
|                                                     | 2K      | 60 years  | Caucasian | 1 year                    | M    | 38.3 | CVA         | IIAM         |
|                                                     | 2L      | 49 years  | Caucasian | 3 years                   | F    | 33.8 | CVA         | IIAM         |
| <b>Normal Adult Islets (Gels and scRNA-Seq)</b>     | I1      | 40 years  | Caucasian | --                        | F    | 30.8 | Head Trauma | IIDP         |
|                                                     | I2      | 41 years  | N/A       | --                        | M    | 20.3 | N/A         | IIDP         |
|                                                     | I3      | 42 years  | Caucasian | --                        | M    | 32.2 | Overdose    | IIDP         |
|                                                     | HPAP022 | 39 years  | Caucasian | --                        | F    | 34.7 | Anoxia      | HPAP         |
|                                                     | HPAP026 | 24 years  | Caucasian | --                        | M    | 20.8 | Anoxia      | HPAP         |
|                                                     | HPAP034 | 13 years  | Caucasian | --                        | M    | 18.6 | Head Trauma | HPAP         |
|                                                     | HPAP035 | 35 years  | Caucasian | --                        | M    | 26.9 | Anoxia      | HPAP         |
|                                                     | HPAP036 | 23 years  | Caucasian | --                        | F    | 16   | Head Trauma | HPAP         |
|                                                     | HPAP037 | 35 years  | Caucasian | --                        | F    | 21.9 | CVA         | HPAP         |
|                                                     | HPAP039 | 5 years   | Caucasian | --                        | F    | 16.3 | Anoxia      | HPAP         |
|                                                     | HPAP040 | 35 years  | Caucasian | --                        | M    | 23.9 | CVA         | HPAP         |
|                                                     | HPAP042 | 1 year    | Caucasian | --                        | M    | 17.9 | Anoxia      | HPAP         |
|                                                     | HPAP044 | 3 years   | Caucasian | --                        | F    | 12   | Anoxia      | HPAP         |
| HPAP047                                             | 8 years | Caucasian | --        | M                         | 16.8 | CVA  | HPAP        |              |
| <b>COVID-19 Patient Autopsy Samples (Histology)</b> | 1       | 82 years  | Caucasian | --                        | M    | 26.8 | ALI         | VUMC Autopsy |
|                                                     | 2       | 97 years  | Caucasian | --                        | F    | 19.7 | ALI         | VUMC Autopsy |
|                                                     | 3       | 81 years  | Caucasian | >10 years <sup>a</sup>    | M    | 23.3 | ALI         | VUMC Autopsy |
|                                                     | 4       | 60 years  | Hispanic  | --                        | M    | 36.7 | ALI         | VUMC Autopsy |
|                                                     | 5       | 51 years  | Hispanic  | 23 years                  | M    | 29.4 | ALI         | VUMC Autopsy |
|                                                     | 6       | 60 years  | Caucasian | --                        | F    | 38.4 | PE          | VUMC Autopsy |
|                                                     | 7       | 71 years  | Black     | Pre-existing <sup>b</sup> | M    | 31.5 | ALI         | VUMC Autopsy |

ALI – acute lung injury; CVA, cerebrovascular accident; HPAP – Human Pancreas Analysis Program (Human Islet Research Network); ICH, intracerebral hemorrhage; IIAM – International Institute for the Advancement of Medicine; IIDP – Integrated Islet Distribution Program; N/A – not available; NDRI – National Disease Research Interchange; OPO – Organ Procurement Organization; PE – pulmonary embolism; T1D = type 1 diabetes; T2D – type 2 diabetes; TNDS – Tennessee Donor Services, Nashville; VUMC Autopsy – Vanderbilt University Medical Center Autopsy Pathology

<sup>a</sup>Oldest clinical patient note including diagnosis of diabetes mellitus was signed in 2010, suggesting disease duration of at least 10 years.

<sup>b</sup>Patient was prescribed an oral anti-diabetic medication confirming pre-existing diabetes diagnosis of unknown duration prior to admission with COVID-19.
